# Supplementary material for: Sars-Cov-2 Infection in Patients on Long-Term Treatment with Macrolides in Spain: A National Cross-Sectional Study
Source: MDPI journal article supplement (doi:10.3390/antibiotics10091039), 2021-08-25
Supplement: s1 [file s1]

## Article

# Sars-Cov-2 Infection in Patients on Long-Term Treatment with Macrolides in Spain: A National Cross-Sectional Study

Carmen Marina Meseguer Barros <sup>1</sup>, Natalia Alzueta Isturiz <sup>2</sup>, Rita Sainz de Rozas Aparicio <sup>3</sup>, Rafael Aguilera Vizcaíno <sup>4</sup>, Laura López Esteban <sup>5,†</sup>, Sonia Anaya Ordóñez <sup>6</sup>, Itxasne Lekue Alkorta <sup>7,‡</sup>, Salvadora Martín Suances <sup>6</sup>, Jorge Ignacio Jiménez Arce <sup>8</sup>, Maite Fernández Vicente <sup>9</sup>, Yolanda Borrego Izquierdo <sup>10</sup>, Raquel Prieto Sánchez <sup>10</sup>, Silvia Casado Casuso <sup>10</sup>, Rosa Madridejos <sup>11</sup>, Carmen Marquina Verde <sup>9,§</sup>, Rosa Tomás Sanz <sup>11</sup>, María Oro Fernández <sup>12</sup>, Sara Gallardo Borge <sup>11</sup>, Eva Lázaro López <sup>13</sup>, María Belén Pina Gadea <sup>14</sup>, Mercedes Pereira Pía <sup>15</sup>, María Victoria Maestre Sánchez <sup>16</sup>, Esther Ribes Murillo <sup>17</sup>, Constanza Gómez de Oña <sup>18</sup>, María Jesús Lallana Álvarez <sup>14</sup>, Concepción Celaya Lecea <sup>19</sup>, María Ana Prado Prieto <sup>20</sup>, Aranzazu Aranguez Ruiz <sup>21</sup>, Vicente Olmo Quintana <sup>22</sup>, Noemí Villén Romero <sup>23</sup>, Carolina Payá Giner <sup>24</sup>, Angeles Lloret Callejo <sup>25</sup>, Alvaro Fernández Ferreiro <sup>26</sup>, Blanca Basagoiti Carreño <sup>27</sup>, Ana-Aurelia Iglesias Iglesias <sup>28</sup>, Antonio Martín Alonso <sup>27,||</sup>, Ana Díez Alcántara <sup>27</sup>, Esther Marco Tejón <sup>29</sup>, Marta Lestón Vázquez <sup>23</sup>, M<sup>a</sup> Ángeles Ariza Copado <sup>30</sup>, Marta Aparicio Cueva <sup>31</sup>, Belén Escudero Vilaplana <sup>1</sup>, Marisa Nicieza <sup>32</sup>, Gracia Picazo Sanchiz <sup>1</sup>, Genma María Silva Riádigos <sup>1</sup>, Lucía Jamart Sánchez <sup>1</sup>, Ángel García Álvarez <sup>33</sup>, Antonio García Bonilla <sup>34</sup>, Rafael Herrero Delicado <sup>35</sup>, Virginia Arroyo Pineda <sup>36</sup>, Belén de la Hija <sup>36</sup>, Amelia Troncoso Mariño <sup>23</sup>, Isabel Tofiño González <sup>36</sup>, Mónica Susana Mateu García <sup>37</sup>, Pablo García Vázquez <sup>38</sup>, Joaquín Pérez Martín <sup>39</sup> and Rocío Fernández-Urrusuno <sup>40,\*,¶</sup> on behalf of the Infectious Diseases SEFAP Team

## Supplementary data

**Table S1.** Participating Spanish regions and number of patients provided to study.

| Region              | Patients |       | COVID-19 patients |       |
|---------------------|----------|-------|-------------------|-------|
|                     | N        | %     | N                 | %     |
| Madrid              | 502      | 16.42 | 47                | 32.19 |
| Catalonia           | 397      | 12.99 | 18                | 12.33 |
| Andalucia           | 363      | 11.87 | 9                 | 6.16  |
| Basque Country      | 337      | 11.02 | 10                | 6.85  |
| Cantabria           | 322      | 10.53 | 24                | 16.44 |
| Asturias            | 282      | 9.22  | 3                 | 2.05  |
| Castile and Leon    | 228      | 7.46  | 9                 | 6.16  |
| Aragon              | 118      | 3.86  | 5                 | 3.42  |
| Castile La Mancha   | 110      | 3.6   | 8                 | 5.48  |
| Navarre             | 98       | 3.21  | 2                 | 1.37  |
| Galicia             | 66       | 2.16  | 1                 | 0.68  |
| Balearic Islands    | 58       | 1.90  | 2                 | 1.37  |
| Extremadura         | 51       | 1.67  | 1                 | 0.68  |
| Murcia              | 48       | 1.57  | 0                 | 0.00  |
| Canary Islands      | 44       | 1.44  | 5                 | 3.42  |
| Valencian Community | 33       | 1.08  | 2                 | 1.37  |
| Total               | 3,057    | 100   | 146               | 100   |

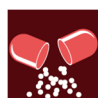**Table S2.** Comorbid conditions analyzed.

---

|                                                                                        |
|----------------------------------------------------------------------------------------|
| Respiratory chronic disease:                                                           |
| Chronic Obstructive Pulmonary Disease (COPD).                                          |
| Cystic fibrosis.                                                                       |
| Bronchiectasis.                                                                        |
| Chronic bronchitis.                                                                    |
| Emphysema.                                                                             |
| Chronic respiratory failure.                                                           |
| Asthma.                                                                                |
| Lung transplant.                                                                       |
| Arterial hypertension.                                                                 |
| Cardiac disease, ischaemic or hypertensive heart disease, cerebrovascular disease:     |
| Heart failure.                                                                         |
| Acute myocardial infarction.                                                           |
| Angina pectoris.                                                                       |
| Stable coronary heart disease.                                                         |
| Peripheral arterial disease.                                                           |
| Transient ischemic attack                                                              |
| Stroke                                                                                 |
| Chronic neurological or mental diseases:                                               |
| Dementia.                                                                              |
| Alzheimer.                                                                             |
| Parkinson.                                                                             |
| Schizophrenia                                                                          |
| Depression.                                                                            |
| Situation that leads to immunosuppression (for an underlying illness or from therapy): |
| Malignancy.                                                                            |
| Transplant.                                                                            |
| Human immunodeficiency virus infection (VIH).                                          |
| Prolonged use of corticoids                                                            |
| Autoimmune diseases:                                                                   |
| Rheumatoid arthritis.                                                                  |
| Lupus erythematosus.                                                                   |
| Psoriasis.                                                                             |
| Celiac disease.                                                                        |
| Inflammatory bowel disease.                                                            |
| Multiple sclerosis.                                                                    |
| Sjögren.                                                                               |
| Other conditions                                                                       |
| Diabetes mellitus                                                                      |
| Chronic kidney disease.                                                                |
| Liver disease or failure.                                                              |

---

**Table S3.** Concomitant treatments analyzed.

---

|                                                 |
|-------------------------------------------------|
| Proton-pump inhibitors (PPI).                   |
| Non steroidal anti-inflammatory drugs (NSAIDs). |
| Analgesics. Non opioids, opioids                |
| Gabapentinoids                                  |
| Antihistamines.                                 |
| Cough suppressants.                             |
| Mucolytics.                                     |
| Inhaled corticoids.                             |
| Systemic corticoids.                            |
| Bronchodilators.                                |
| Other systemic antiasthmatics                   |
| Antidiabetics.                                  |
| Antihypertensives.                              |
| Lipid-lowering agents.                          |
| Antiplatelet drugs.                             |
| Anticoagulants.                                 |
| Antidepressants.                                |
| Benzodiazepines and Z drugs.                    |
| Antipsychotics.                                 |
| Other immunosuppressive agents.                 |
| Systemic antibiotics:                           |
| Antifungal drugs                                |
| Antirheumatics: hidroxicloroquine               |

---
